# Supplementary material
Source: MDPI journal article supplement (https://www.mdpi.com/2624-7402/5/3/75)
Supplement: s1 [file s1]

## Supplementary Material

# Effects of bicarbonate addition and N:P ratio on microalgae growth and resource recovery from domestic wastewater

Mariana Daniel Tango<sup>1</sup>, José Antônio Zanetoni Filho<sup>1\*</sup>, Luiz Antônio Daniel<sup>1</sup>, Luan de Souza Leite<sup>1</sup>, Maria Teresa Hoffmann<sup>1</sup>, Felliipe Henrique Martins Moutinho<sup>1</sup>

<sup>1</sup>Department of Hydraulics and Sanitation, São Carlos School of Engineering, University of São Paulo, Av. Trabalhador São-Carlense, 400, 13566-59, São Carlos-São Paulo, Brazil

\*Corresponding author

e-mail address: jose.z@usp.br

**Table S1.** Characteristics of the inoculum added in each PBR operation.

|                                          |                                        | Stage 1              |                      |                      |                      | Stage 2              |                      | Stage 3              |
|------------------------------------------|----------------------------------------|----------------------|----------------------|----------------------|----------------------|----------------------|----------------------|----------------------|
|                                          | Unit                                   | OPR 1                | OPR 2                | OPR 3                | OPR 4                | OPR 5                | OPR 6                | OPR 7                |
| <b>Dominant microalgae specie</b>        | -                                      | <i>P. pectinatus</i> |
| <b>Cell Density</b>                      | 10 <sup>5</sup> cells·mL <sup>-1</sup> | 1.32 ± 0.01          | 1.12 ± 0.07          | 1.31 ± 0.11          | -                    | -                    | 0.29 ± 0.02          | 9.78 ± 0.81          |
| <b>Cell Biovolume</b>                    | x 10 µm <sup>3</sup>                   | 71.49 ± 44.80        | 107.53 ± 47.00       | 90.59 ± 44.80        | -                    | -                    | 38.51 ± 13.80        | 4.92 ± 26.50         |
| <b>OD<sub>530</sub></b>                  | -                                      | 1.55 ± 0.01          | 0.89 ± 0.01          | 0.80 ± 0.01          | 0.49 ± 0.01          | 1.08 ± 0.01          | 0.40 ± 0.01          | 0.79 ± 0.01          |
| <b>OD<sub>680</sub></b>                  | -                                      | 1.93 ± 0.02          | 0.94 ± 0.02          | 0.93 ± 0.01          | 0.57 ± 0.01          | 1.46 ± 0.01          | 0.45 ± 0.02          | 0.94 ± 0.01          |
| <b>OD<sub>750</sub></b>                  | -                                      | 1.25 ± 0.01          | 0.71 ± 0.01          | 0.67 ± 0.00          | 0.41 ± 0.01          | 0.91 ± 0.02          | 0.31 ± 0.01          | 0.61 ± 0.01          |
| <b>OD<sub>680</sub>/OD<sub>530</sub></b> | -                                      | 1.25 ± 0.01          | 1.05 ± 0.01          | 1.16 ± 0.01          | 1.20 ± 0.01          | 1.35 ± 0.01          | 1.13 ± 0.01          | 1.19 ± 0.01          |
| <b>DW</b>                                | g·L <sup>-1</sup>                      | 0.93 ± 0.12          | 0.52 ± 0.09          | 0.60 ± 0.13          | 0.48 ± 0.08          | 0.66 ± 0.05          | 0.27 ± 0.07          | -                    |

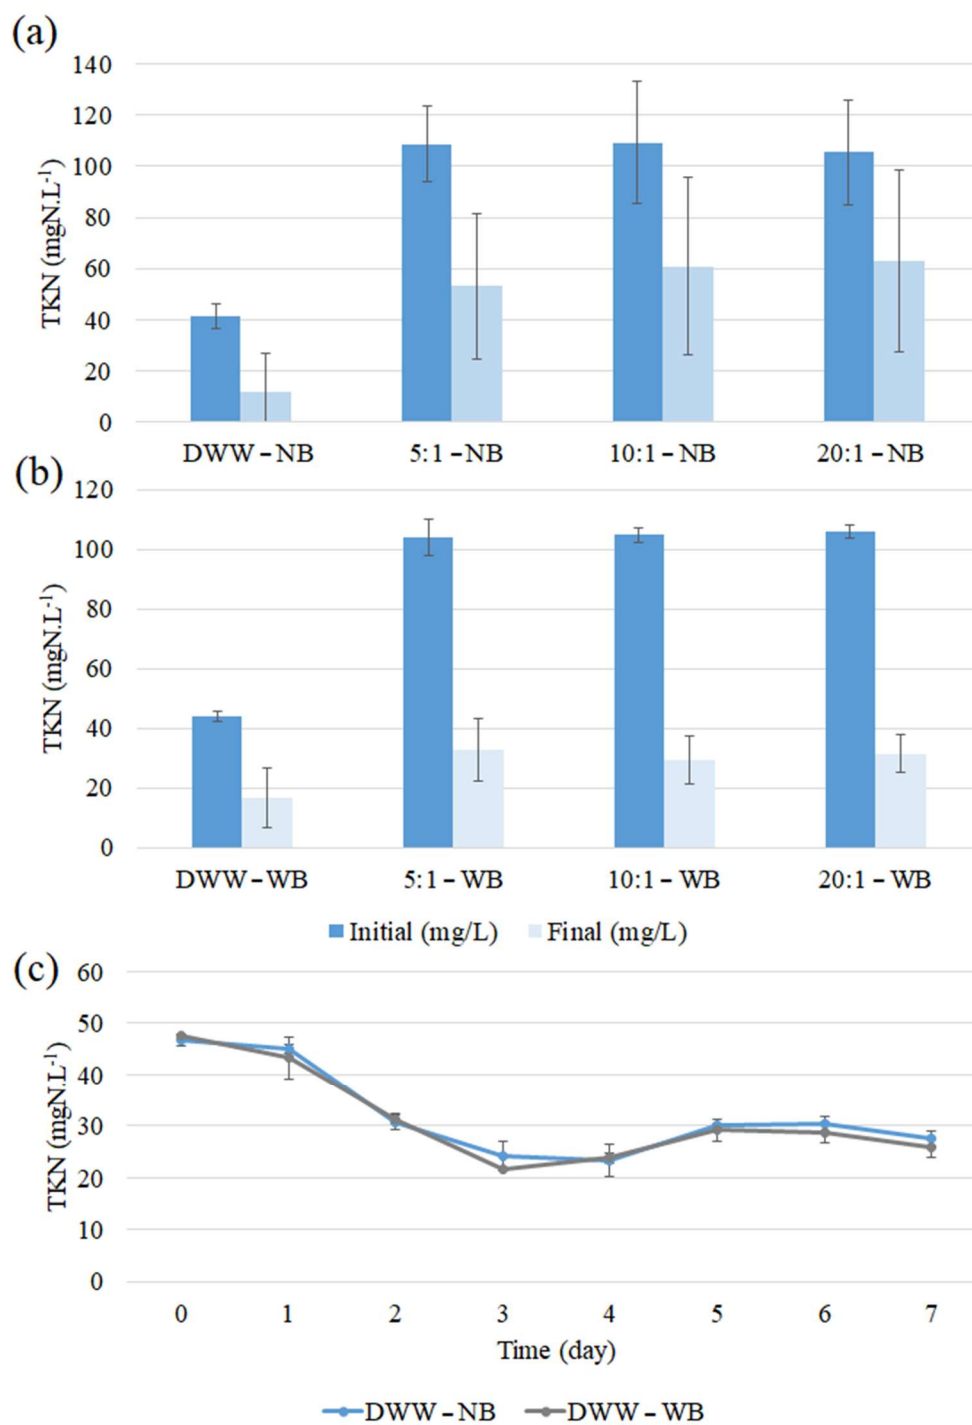

Fig. S1. Total Kjeldhal Nitrogen (TKN) concentrations during the operations of (a) stages 1 (without bicarbonate addition), (b) stage 2 (with bicarbonate addition), and (c) stage 3 (with and without bicarbonate addition). The mean and standard deviation of triplicate samples are shown.

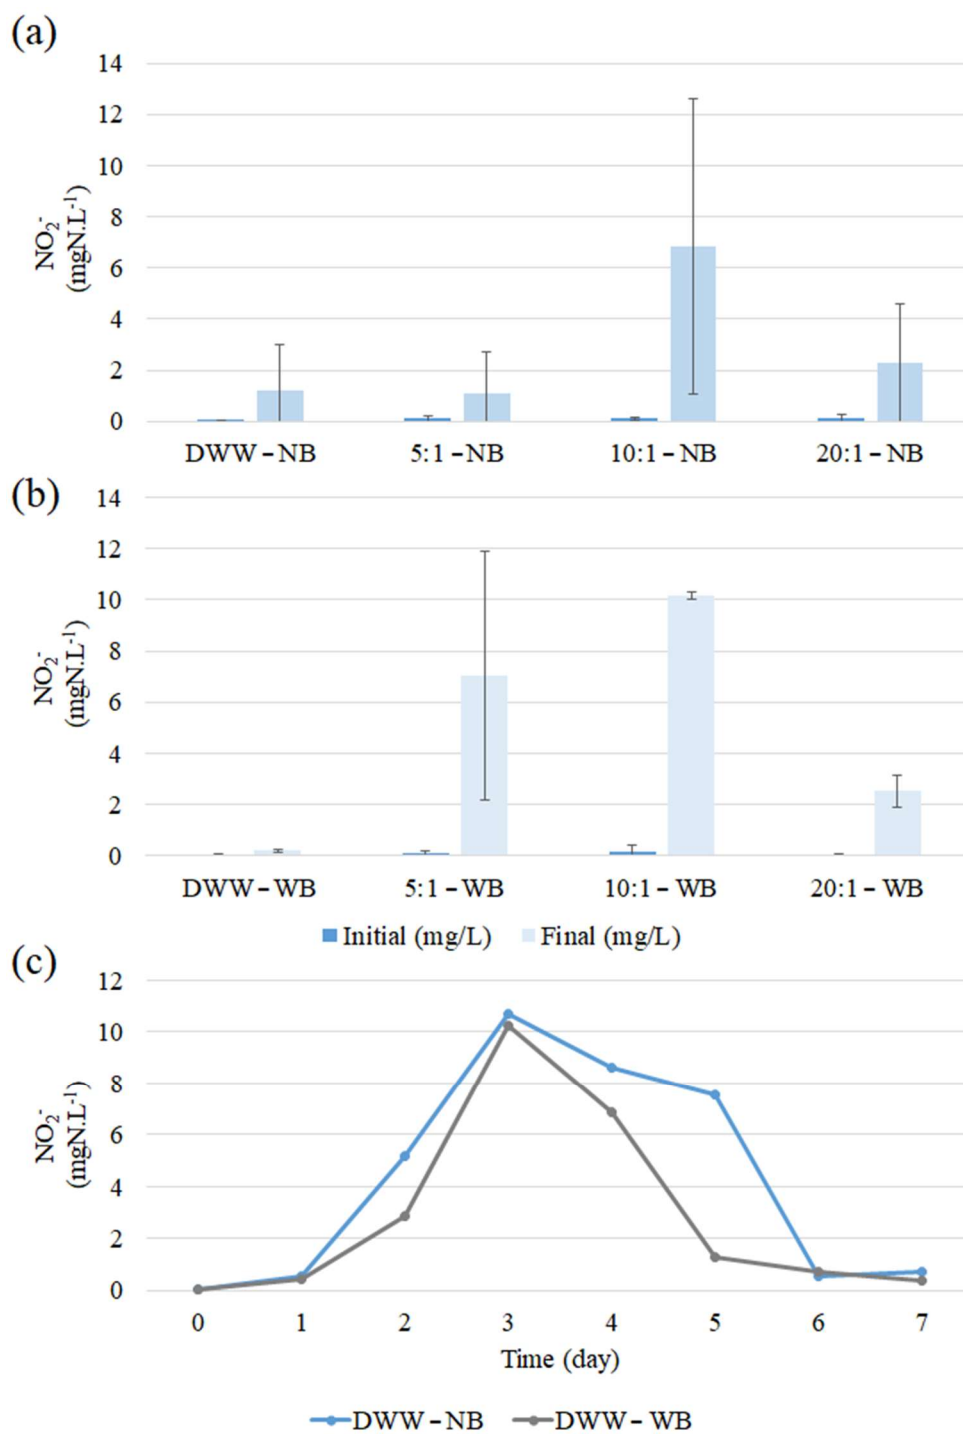

Fig. S2. Nitrite ( $\text{NO}_2^-$ ) concentrations during the operations of (a) stages 1 (without bicarbonate addition), (b) stage 2 (with bicarbonate addition), and (c) stage 3 (with and without bicarbonate addition). The mean and standard deviation of triplicate samples are shown.
